# Supplementary material
Source: PubMed Central journal article supplement (PMC3668655)
Supplement: hdy201284x8.pdf [file hdy201284x8.pdf]

**Table S3 List of published lepidopteran Z-linked genes (excluding *B. mori*).**

| Species →                                                 | <i>Samia<br/>cynthia ricini</i> | <i>Antheraea<br/>pernyi</i> | <i>Manduca<br/> sexta</i> | <i>Agrilus<br/>convolvuli</i> | <i>Biston<br/>betularia</i> | <i>Ostrinia<br/>nubilalis</i> | <i>Heliconius<br/>melpomene</i> | <i>Bicyclus<br/>anyranana</i> | <i>Papilio<br/>glaucus + canadensis</i> | <i>Cydia<br/>pomonella</i> | <i>Pirella<br/>xylostella</i> |
|-----------------------------------------------------------|---------------------------------|-----------------------------|---------------------------|-------------------------------|-----------------------------|-------------------------------|---------------------------------|-------------------------------|-----------------------------------------|----------------------------|-------------------------------|
| Gene ↓                                                    |                                 |                             |                           |                               |                             |                               |                                 |                               |                                         |                            |                               |
| <i>laminin A</i>                                          |                                 |                             |                           |                               | LM, FISH                    |                               |                                 |                               |                                         |                            |                               |
| <i>kettin</i>                                             | FISH [1]                        |                             |                           |                               | FISH                        | LM [4,5]                      |                                 |                               | Inh [10]                                |                            |                               |
| <i>titin</i>                                              |                                 |                             | FISH [3]                  | FISH [3]                      |                             |                               |                                 |                               | Inh [10]                                |                            |                               |
| <i>ATP-binding cassette sub-family F member 2 (ABCF2)</i> |                                 |                             |                           |                               | LM, FISH                    |                               |                                 |                               |                                         |                            |                               |
| <i>tan</i>                                                |                                 |                             |                           |                               | LM, FISH                    |                               |                                 |                               |                                         |                            |                               |
| <i>imaginal disc growth factor (idgf) (BaC2115)</i>       |                                 |                             |                           |                               | LM, FISH                    |                               |                                 | LM [9]                        |                                         |                            |                               |
| <i>tyrosine hydroxylase (TH)</i>                          |                                 |                             |                           |                               | LM                          |                               |                                 |                               |                                         |                            |                               |
| <i>Paramyosin</i>                                         |                                 |                             |                           |                               | LM, FISH                    | LM [4]                        |                                 |                               |                                         |                            |                               |
| <i>period</i>                                             |                                 | South [2]                   |                           |                               | LM, FISH                    |                               |                                 |                               | Inh [10]                                | South [12]                 |                               |
| <i>6-phosphogluconate dehydrogenase (6-PGD)</i>           |                                 |                             |                           |                               | LM, FISH                    |                               |                                 |                               | Inh [11]                                |                            |                               |
| <i>triosephosphate isomerase (tpi)</i>                    |                                 |                             |                           |                               | LM                          | LM [5,6]                      | LM [7]                          | LM [8]                        | Inh [10]                                |                            |                               |
| <i>lactate dehydrogenase (Ldh)</i>                        |                                 |                             |                           |                               | LM, FISH                    | LM [4,5]                      |                                 |                               | Inh [10,11]                             |                            |                               |
| <i>Henna (PAH)</i>                                        |                                 |                             |                           |                               | LM, FISH                    |                               |                                 | LM [9]                        |                                         |                            |                               |
| <i>Y-box protein (BYB)</i>                                | FISH [1]                        |                             |                           |                               |                             |                               |                                 |                               |                                         |                            |                               |
| <i>catalase</i>                                           |                                 |                             |                           |                               |                             |                               |                                 | LM [9]                        |                                         |                            | LM [13]                       |
| <i>ephrin receptor</i>                                    |                                 |                             | FISH [3]                  | FISH [3]                      |                             |                               |                                 |                               |                                         |                            |                               |
| <i>epidermal growth factor receptor (EGF rec)</i>         |                                 |                             | FISH [3]                  |                               |                             |                               |                                 |                               |                                         |                            |                               |
| <i>NADH dehydrogenase (ubiquinone)</i>                    |                                 |                             | FISH [3]                  | FISH [3]                      |                             |                               |                                 |                               |                                         |                            |                               |
| <i>P-glycoprotein</i>                                     |                                 |                             | FISH [3]                  | FISH [3]                      |                             |                               |                                 |                               |                                         |                            |                               |
| <i>apterous</i>                                           |                                 |                             |                           |                               |                             |                               | LM [7]                          |                               |                                         |                            |                               |
| <i>acid phosphatase (Acp)</i>                             |                                 |                             |                           |                               |                             |                               |                                 |                               | Inh [11]                                |                            |                               |
| <i>shaker</i>                                             |                                 |                             |                           |                               |                             |                               |                                 |                               |                                         |                            |                               |
| <i>MiniParamyosin</i>                                     |                                 |                             |                           |                               |                             |                               |                                 |                               |                                         |                            |                               |
| <i>FK506-binding protein</i>                              |                                 |                             |                           |                               |                             |                               |                                 |                               |                                         |                            |                               |
| <i>Cuticular protein</i>                                  |                                 |                             |                           |                               |                             |                               |                                 |                               |                                         |                            |                               |
| <i>Coatomer protein subunit</i>                           |                                 |                             |                           |                               |                             |                               |                                 |                               |                                         |                            |                               |
| <i>Stretchin</i>                                          |                                 |                             |                           |                               |                             |                               |                                 |                               |                                         |                            | LM [13]                       |
| <i>MYST histone acetyltransferase (MOF) (BaC1211)</i>     |                                 |                             |                           |                               |                             |                               |                                 | LM [9]                        |                                         |                            |                               |
| <i>BaC2745</i>                                            |                                 |                             |                           |                               |                             |                               |                                 | LM [9]                        |                                         |                            |                               |
| <i>BaC2817</i>                                            |                                 |                             |                           |                               |                             |                               |                                 | LM [9]                        |                                         |                            |                               |
| <i>BaC4049</i>                                            |                                 |                             |                           |                               |                             |                               |                                 | LM [9]                        |                                         |                            |                               |
| <i>BaC5197</i>                                            |                                 |                             |                           |                               |                             |                               |                                 | LM [9]                        |                                         |                            |                               |
| <i>BaC5904</i>                                            |                                 |                             |                           |                               |                             |                               |                                 | LM [9]                        |                                         |                            |                               |

Gene names are listed in the first column with alternative identifiers or frequently used abbreviations in brackets. Methods used to confirm Z-linkage are abbreviated as: FISH (fluorescence in situ hybridization); South (Southern hybridization); LM (linkage mapping); Inh (hemizygous inheritance). References are numbered in square brackets and listed in full below the table; all *B. betularia* data originate from this study. Only confirmed Z-linked genes are given in *O. nubilalis* and only the two genes specifically mentioned in the text are included for *P. xylostella* since only uniref90 best hits are available for this species. All except two genes (31/33) are also Z-linked in *B. mori*. *MYST histone acetyltransferase* (BGIBMGA006995) is located on chromosome 17 in *B. mori* and the identity of *Papilio spp. acid phosphatase* is unclear; however no *acid phosphatase* homologs occur on the Z-chromosome scaffolds of *B. mori*.

## References

1. Yoshido A, Sahara K, Marec F, Matsuda Y (2011) Step-by-step evolution of neo-sex chromosomes in geographical populations of wild silkmoths, *Samia cynthia ssp.* Heredity 106: 614-624.
2. Gotter AL, Levine JD, Reppert SM (1999) Sex-linked period genes in the silkmoth, *Antheraea pernyi*: implications for circadian clock regulation and the evolution of sex chromosomes. Neuron 24: 953-965.
3. Yasukochi Y, Tanaka-Okuyama M, Shibata F, Yoshido A, Marec F, et al. (2009) Extensive conserved synteny of genes between the karyotypes of *Manduca sexta* and *Bombyx mori* revealed by BAC-FISH mapping. PLoS ONE 4: e7465.
4. Kroemer J, Coates B, Nusawardani T, Rider S, Fraser L, et al. (2011) A rearrangement of the Z chromosome topology influences the sex-linked gene display in the European corn borer, *Ostrinia nubilalis*. Mol Genet Genomics 286: 37-56.
5. Dopman EB, Pérez L, Bogdanowicz SM, Harrison RG (2005) Consequences of reproductive barriers for genealogical discordance in the European corn borer. Proc Natl Acad Sci USA 102: 14706-14711.
6. Dopman EB, Bogdanowicz SM, Harrison RG (2004) Genetic mapping of sexual isolation between E and Z pheromone strains of the European corn borer (*Ostrinia nubilalis*). Genetics 167: 301-309.
7. Jiggins CD, Mavarez J, Beltrán M, McMillan WO, Johnston JS, et al. (2005) A genetic linkage map of the mimetic butterfly *Heliconius melpomene*. Genetics 171: 557-570.
8. Van't Hof AE, Marec F, Saccheri IJ, Brakefield PM, Zwaan BJ (2008) Cytogenetic characterization and AFLP-based genetic linkage mapping for the Butterfly *Bicyclus anynana*, covering all 28 karyotyped chromosomes. PLoS ONE 3: e3882.
9. Beldade P, Saenko SV, Pul N, Long AD (2009) A gene-based linkage map for *Bicyclus anynana* butterflies allows for a comprehensive analysis of synteny with the lepidopteran reference genome. PLoS Genet 5: e1000366.
10. Putnam AS, Scriber JM, Andolfatto P (2007) Discordant divergence times among Z-chromosome regions between two ecologically distinct swallowtail butterfly species. Evolution 61: 912-927.
11. Hagen RH, Scriber JM (1989) Sex-linked diapause, color, and allozyme loci in *Papilio glaucus*: linkage analysis and significance in a hybrid zone. J Hered 80: 179-185.
12. Fuková I, Neven LG, Bárcenas NM, Gund NA, Dalíková M, et al. (2009) Rapid assessment of the sex of codling moth *Cydia pomonella* (Linnaeus) (Lepidoptera: Tortricidae) eggs and larvae. J Appl Entomol 133: 249-261.
13. Baxter SW, Davey JW, Johnston JS, Shelton AM, Heckel DG, et al. (2011) Linkage mapping and comparative genomics using next-generation RAD sequencing of a non-model organism. PLoS ONE 6: e19315.
